# Supplementary material for: Metformin Inhibits Hepatic Gluconeogenesis Through AMP-Activated Protein Kinase–Dependent Regulation of the Orphan Nuclear Receptor SHP
Source: Oxford University Press journal article supplement (doi:10.2337/db07-0381), 2007-10-02
Supplement: db070381onlineappendfiglegends.doc [file db070381onlineappendfiglegends.doc]

**Supplemental FIG. 1.** **AMPK activation induces AMPK phosphorylation and represses hepatic gluconeogenic gene expression via SHP.**

***A*:** H4IIE cell lines were cultured under serum-free condition for 24 h. This cell was then treated with various doses of AICAR, and compound C for 12 h in the presence or absence of metformin. The cell lysates were prepared and total protein (40 μg) were resolved on SDS-PAGE gel. ACC, and AMPK phosphorylation and total AMPK were immunoblotted with anti-phospho (α-pACC), anti-phospho–Thr-172 AMPKα antibody (α-pAMPK) and total AMPK antibody, respectively. The levels of ACC and AMPK protein were normalized to β-actin as an internal control. The data representative of three independently performed Western blot analyses. ***B*:** H4IIE cell lines were infected with adenovirus AMPK (Ad-AMPK) or the adenovirus dominant negative form of AMPK (Ad-DN AMPK) at a multiplicity of infection (MOI) of 30 or 60 for 24 h in the presence of cAMP/Dex. The mRNA levels were analyzed via Northern blot using SHP, PEPCK, and G6Pase probes, and normalized to an internal control (GAPDH). These results were independently confirmed at three times. Met, injected with metformin; Com C, treated with compound C.

**Supplemental FIG. 2. Metformin inhibits the promoter activities and gene expression of hepatic gluconeogenic genes.**

***A* and *B*:** HepG2 cell lines were cotransfected with 200 ng each of the PEPCK and G6Pase reporter genes, and FoxO1 together with SHP and, after transfection for 24 h, were incubated in the indicated dose of metformin for 12 h. Luciferase activity was measured after 36 h and was normalized to β-galactosidase activity. Alternatively, the cells were cotransfected with the PEPCK and G6Pase promoter constructs, FoxO1 and the siRNA SHP or the siRNA scrambled and incubated with or without metformin. Luciferase activity was normalized to β-galactosidase activity in order to correct for variations in transfection efficiency. The data shown are representative of the means of five independent experiments. Data are expressed as fold activation relative to the control (SEM).

**Supplemental FIG. 3. Downregulations of PEPCK and G6Pase gene expression by metformin are mediated via SHP.**

H4IIE cell lines were infected with adenovirus SHP (Ad-SHP) for various time periods up to 24 h and/or with various doses of each adenovirus for 24 h after 12 h of cAMP/Dex pretreatment. PEPCK and G6Pase expression were normalized to GAPDH as an internal control. The data presented are representative of three independently performed Northern blot analyses.

**Supplemental FIG. 4. Metformin increases the phosphorylation of ACC and AMPK in liver of B6-*Lepob/ob*** **mice in a dose-dependent manner.**

ACC and AMPK phosphorylation in the livers of B6-*Lepob/ob* female mice were evaluated in a dose-dependent manner after the oral administration of metformin for 6 h (50-400 mg/kg body weight) in the feeding condition. The phosphorylation of ACC, AMPK and total AMPK was determined via immunoblotting with anti-phospho (α-pACC), anti-phospho–Thr-172 AMPKα antibody (α-pAMPK) and total AMPK antibody, respectively. The expression of ACC, and AMPK protein was normalized to β-actin as an internal control. The data presented are representative of three independently performed Western blot analyses. All mice were separated into experimental groups (n=4 per group).
